# Supplementary material for: GABA Application Enhances Drought Stress Tolerance in Wheat Seedlings (Triticum aestivum L.)
Source: MDPI journal article supplement (doi:10.3390/plants12132495), 2023-06-29
Supplement: s1 [file s1]

## Supplementary material

### GABA application enhances drought stress tolerance in wheat seedlings (*Triticum aestivum* L.)

**Table S1** Pearson correlations for variables of phenolics contents and enzymes of phenolics biosynthesis in wheat seedlings with GABA treatment

| Indicators                    | Total phenolic | Total phenolic acid | <i>p</i> -hydroxybenzoic acid | vanillic acid | syringic acid | <i>p</i> -coumaric acid | ferulic acid | sinapic acid | PAL     | C4H   |
|-------------------------------|----------------|---------------------|-------------------------------|---------------|---------------|-------------------------|--------------|--------------|---------|-------|
| Total phenolic acid           | 0.953**        |                     |                               |               |               |                         |              |              |         |       |
| <i>p</i> -hydroxybenzoic acid | 0.504          | 0.492               |                               |               |               |                         |              |              |         |       |
| vanillic acid                 | 0.468          | 0.522*              | 0.750**                       |               |               |                         |              |              |         |       |
| syringic acid                 | 0.901**        | 0.895**             | 0.145                         | 0.412         |               |                         |              |              |         |       |
| <i>p</i> -coumaric acid       | 0.681**        | 0.753**             | 0.703**                       | 0.878**       | 0.596*        |                         |              |              |         |       |
| ferulic acid                  | 0.941**        | 0.975**             | 0.370                         | 0.340         | 0.880**       | 0.595*                  |              |              |         |       |
| sinapic acid                  | 0.866**        | 0.937**             | 0.399                         | 0.532*        | 0.904**       | 0.709**                 | 0.895**      |              |         |       |
| PAL                           | 0.075          | -0.15               | -0.104                        | -0.337        | -0.183        | -0.307                  | 0.118        | -0.256       |         |       |
| C4H                           | 0.927**        | 0.923**             | 0.503                         | 0.378         | 0.869**       | 0.592*                  | 0.938**      | 0.802**      | 0.232   |       |
| 4CL                           | 0.444          | 0.360               | 0.103                         | -0.078        | 0.243         | -0.020                  | 0.472        | 0.140        | 0.859** | 0.586 |

Note: \* represent significant level at  $p < 0.05$ . \*\* represent significant level at  $p < 0.01$ .

**Table S2** Pearson correlations for variables of phenolics contents and antioxidant capacity in wheat seedlings with GABA treatment

| Indicators                    | Total phenolic | Total phenolic acid | <i>p</i> -hydroxybenzoic acid | vanillic acid | syringic acid | <i>p</i> -coumaric acid | ferulic acid | sinapic acid | ABTS values |
|-------------------------------|----------------|---------------------|-------------------------------|---------------|---------------|-------------------------|--------------|--------------|-------------|
| Total phenolic acid           | 0.953**        |                     |                               |               |               |                         |              |              |             |
| <i>p</i> -hydroxybenzoic acid | 0.504          | 0.492               |                               |               |               |                         |              |              |             |
| vanillic acid                 | 0.468          | 0.522*              | 0.750**                       |               |               |                         |              |              |             |
| syringic acid                 | 0.901**        | 0.895**             | 0.145                         | 0.412         |               |                         |              |              |             |
| <i>p</i> -coumaric acid       | 0.681**        | 0.753**             | 0.703**                       | 0.878**       | 0.596*        |                         |              |              |             |
| ferulic acid                  | 0.941**        | 0.975**             | 0.370                         | 0.340         | 0.880**       | 0.595*                  |              |              |             |
| sinapic acid                  | 0.866**        | 0.937**             | 0.399                         | 0.532*        | 0.904**       | 0.709**                 | 0.895**      |              |             |
| ABTS values                   | 0.952**        | 0.924**             | 0.486                         | 0.408         | 0.843**       | 0.590*                  | 0.941**      | 0.793**      |             |
| DPPH values                   | 0.959**        | 0.976**             | 0.458                         | 0.445         | 0.955**       | 0.673**                 | 0.968**      | 0.922**      | 0.939**     |

Note: \* represent significant level at  $p < 0.05$ . \*\* represent significant level at  $p < 0.01$ .
